# Supplementary material
Source: PubMed Central journal article supplement (PMC4203626)
Supplement: supp_141010_five-ebola-1-at.pdf [file supp_141010_five-ebola-1-at.pdf]

**Appendix 1: Map showing countries affected by the 2014 Ebola outbreak**

# Africa

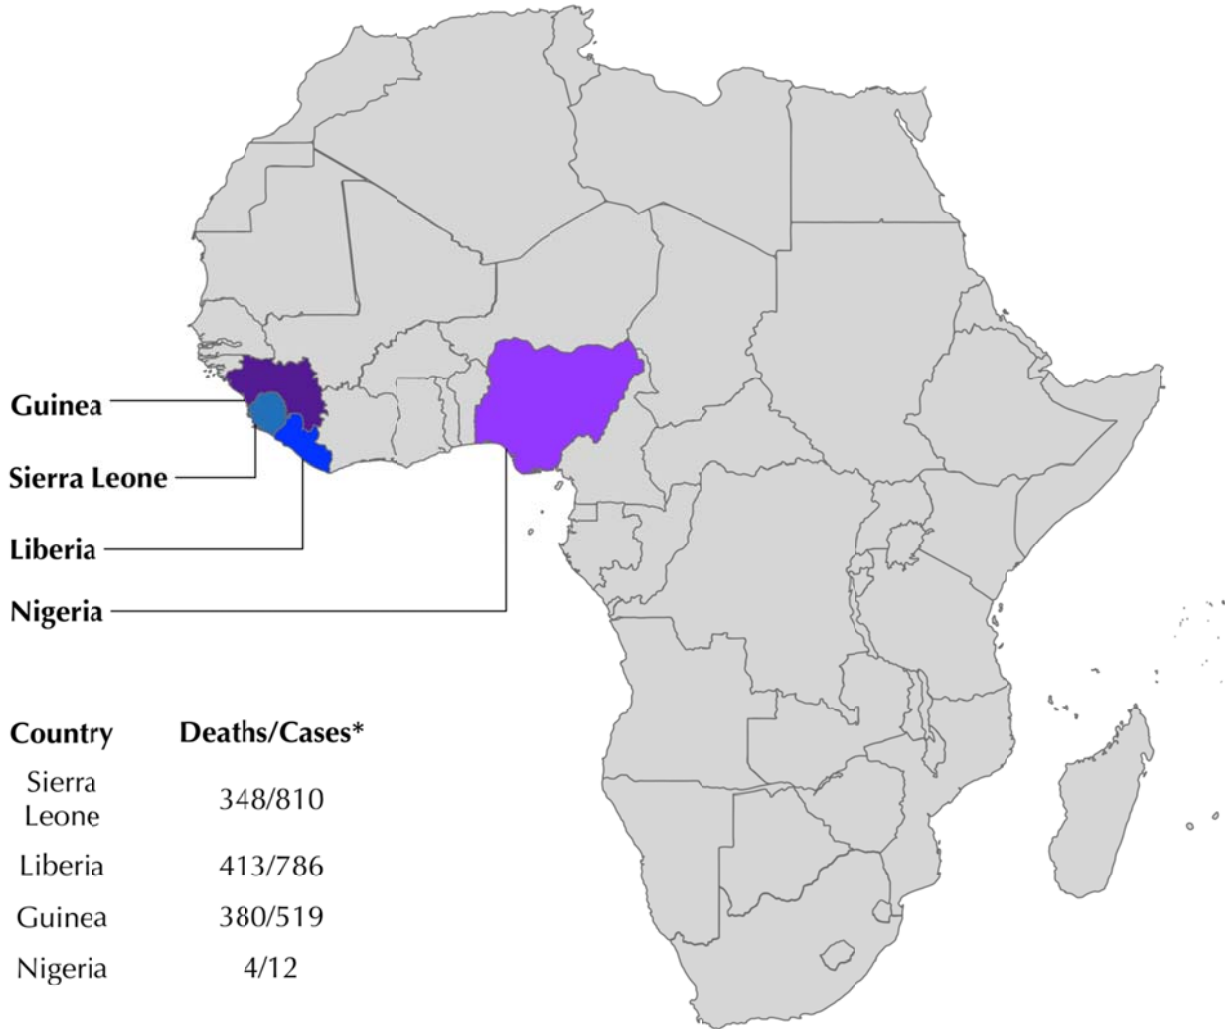

\*Cases include confirmed, probable, and suspected cases as of August 15th, 2014  
Source: [http://www.who.int/csr/don/2014\\_08\\_15\\_ebola/en/](http://www.who.int/csr/don/2014_08_15_ebola/en/)  
Created with: OmniGraffle version 6, from Omni Group, Seattle Washington
